# Supplementary material for: A mussel-like, biodegradable natural hydrogel can effectively prevent adhesion after cardiac surgery
Source: Royal Society of Chemistry journal article supplement (doi:10.1039/d5na00005j), 2025-01-01
Supplement: d5na00005j1.pdf [file d5na00005j1.pdf]

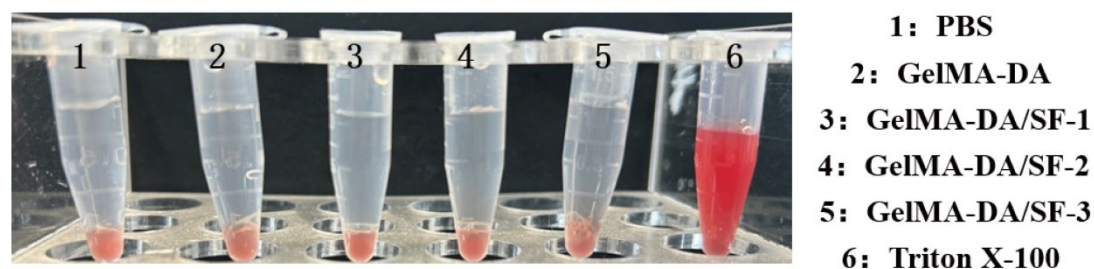

Figure S1. In vitro blood compatibility test.

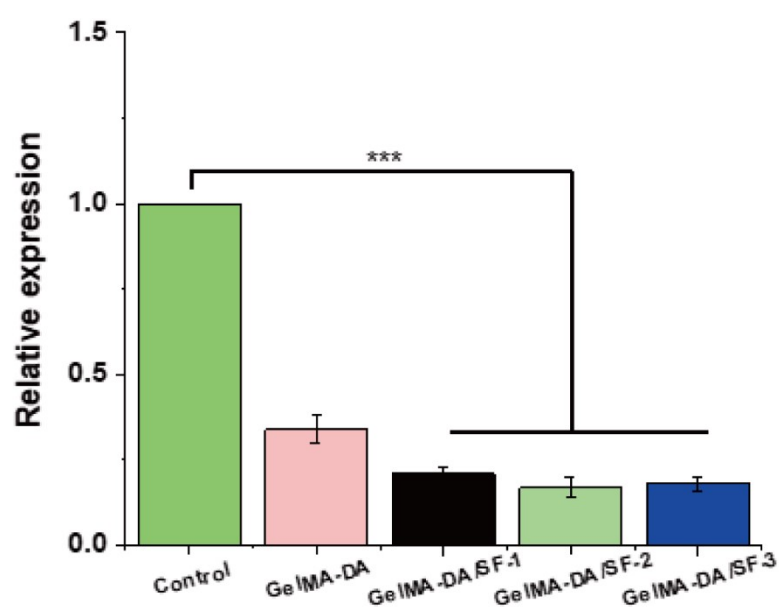

Figure S2. ROS detection of GelMA-DA/SF hydrogel in each group.

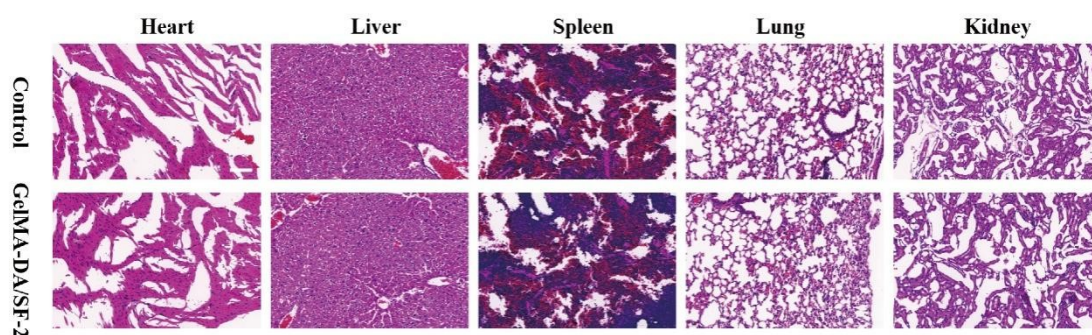

Figure S3. Schematic diagram of the in vivo systemic toxicity test. H&E staining images of the heart, lungs, spleen, liver, and kidneys (scale bar: 200  $\mu$ m).
